# Supplementary material for: Study within a trial (SWAT) protocol. Investigating the effect of personalised versus non-personalised study invitations on recruitment: An embedded randomised controlled recruitment trial
Source: PubMed Central journal article supplement — Contemp Clin Trials Commun. 2020 Apr 24;18:100572. doi: 10.1016/j.conctc.2020.100572 (PMC7214762; doi:10.1016/j.conctc.2020.100572), 2020-04-24

Note: This is an English translation of the original Swedish invitation letters

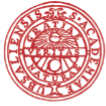

UPPSALA  
UNIVERSITET

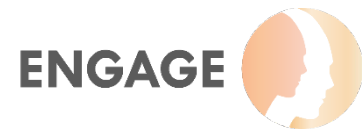

### Invitation to the research project:

ENGAGE, testing of the self-help program EJDeR for parents of children  
previously treated for cancer

Hej!

As a group of researchers at Uppsala University, we have developed an internet-based self-help program for parents of children previously treated for cancer. We have developed the program together with parents of children previously treated for cancer. We hope that the program can help parents who are experiencing emotional difficulties related to their child's illness, such as feeling low, down, sad, scared, worried, or angry.

You are invited to take part in a project in which we will test if parents wish to use the program and experience it as helpful. The sponsor is Uppsala University. We were provided with your information via the Swedish Child Cancer Registry and the Swedish Tax Agency's Registry NAVET.

In this invitation pack you will find:

- A full study information sheet
- A reply slip should you like to receive more information
- An opt-out form if you would rather not participate
- A stamped addressed envelope

You can also find more information about the project by:

- Visiting: [www.u-care.se/Engage](http://www.u-care.se/Engage)
- Emailing: [foraldrar@kbh.uu.se](mailto:foraldrar@kbh.uu.se)
- Calling: 018-471 65 77

If you are interested in participating in the project, you can register via [www.u-care.se/Engage](http://www.u-care.se/Engage) using this the following recruitment code: **[insert code]**

Kind regards,

Our research is supported by:

**Louise von Essen**

Professor, Principal Investigator  
Department of Women's and Children's Health  
Uppsala University  
Tel: 070-425 07 14  
Email: [louise-von.essen@kbh.uu.se](mailto:louise-von.essen@kbh.uu.se)

**Martin Hedqvist**

Parent of a child previously treated  
for cancer

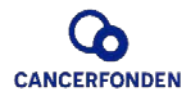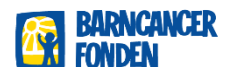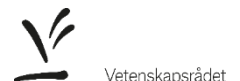

Supplement: mmc2.pdf [file mmc2.pdf]
